# Supplementary material for: Valine aminoacyl-tRNA synthetase promotes therapy resistance in melanoma
Source: PubMed Central journal article supplement (PMC11252002; doi:10.1038/s41556-024-01439-2), 2024-06-07

Related to Extended data figure 7b

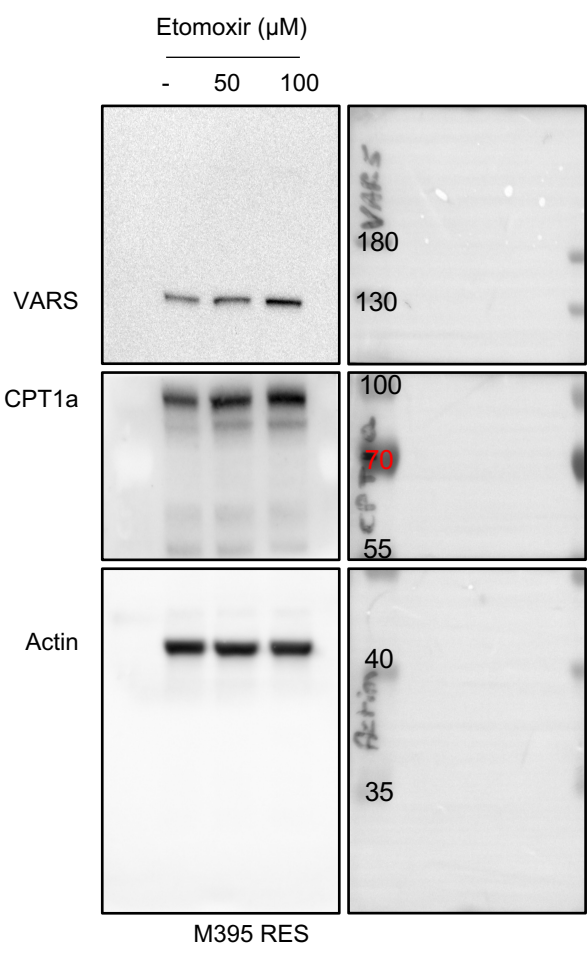

Related to Extended data figure 7d

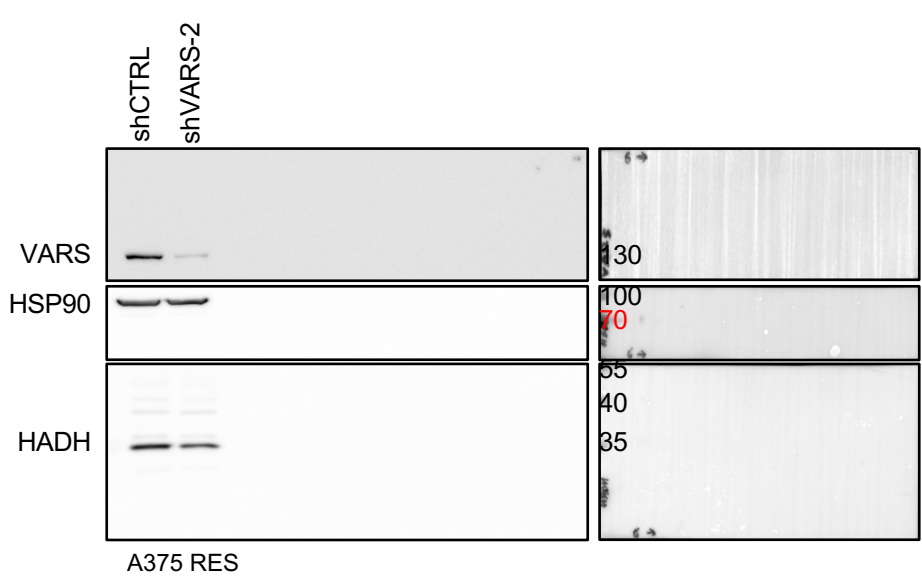

Related to Extended data figure 7d

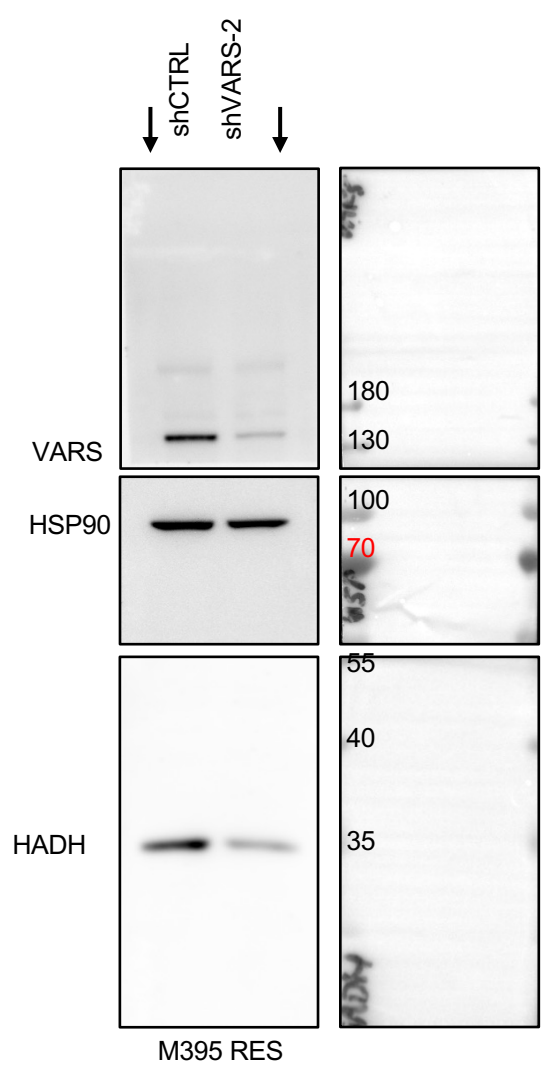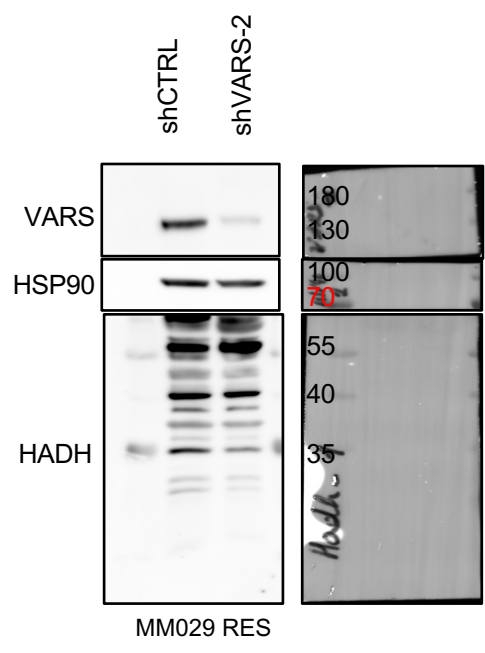

Related to  
Extended data figure 7f

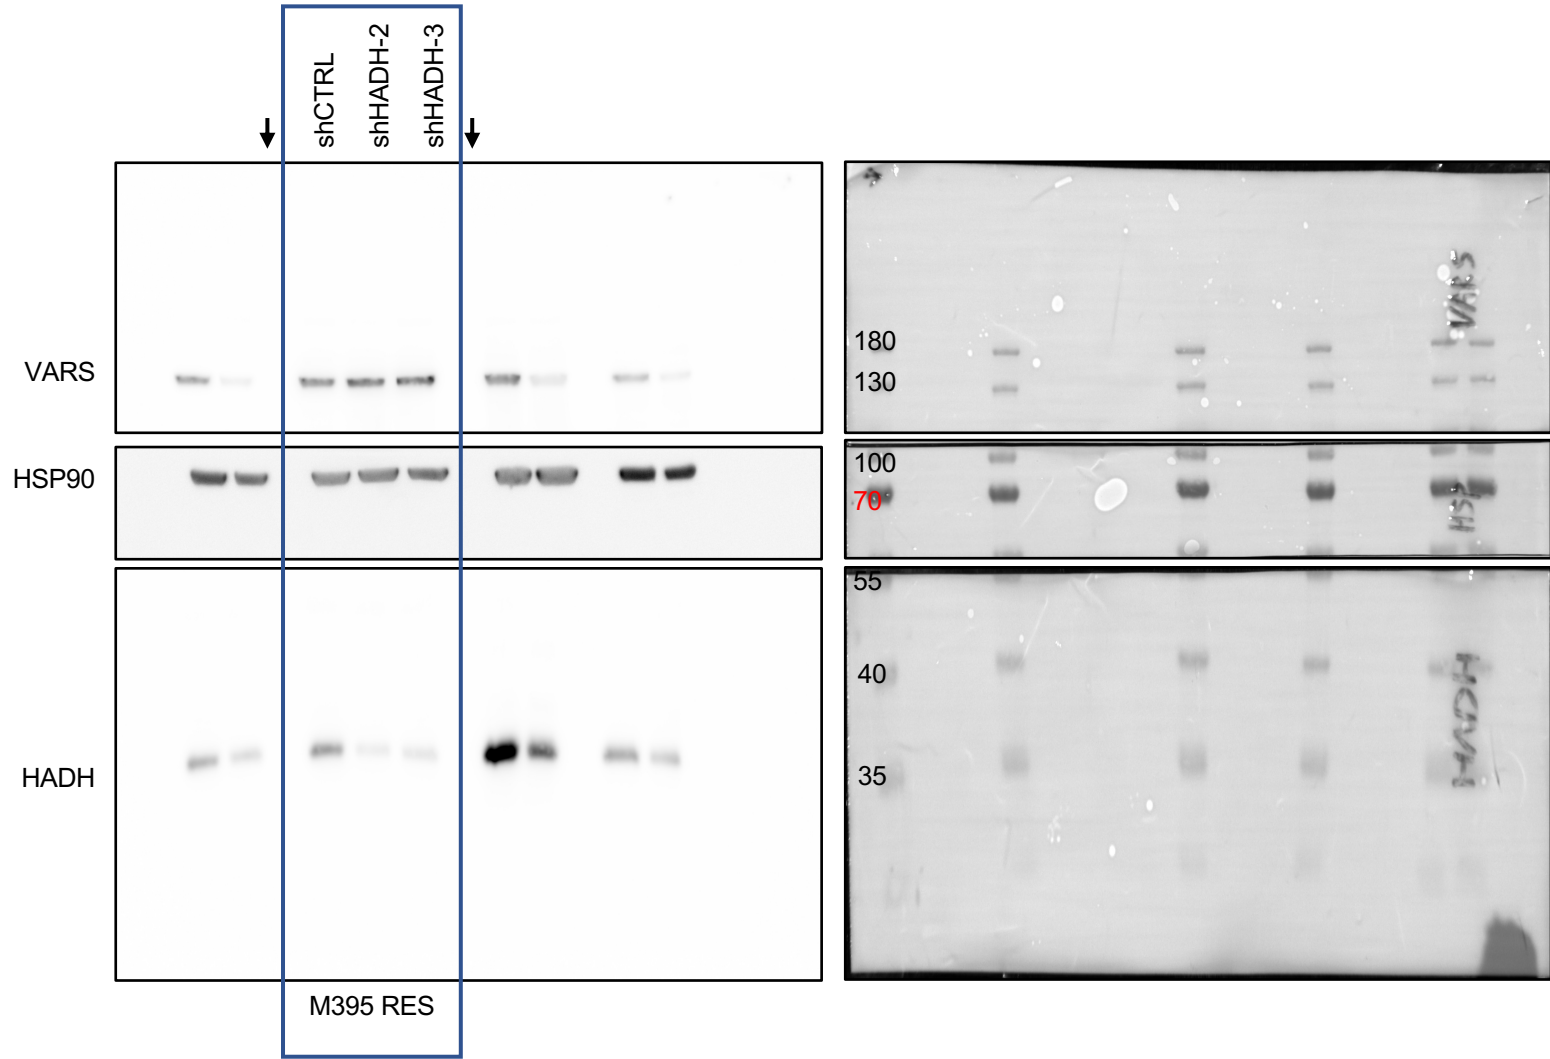

Related to  
Extended data figure 7f

Related to  
Extended data figure 7g

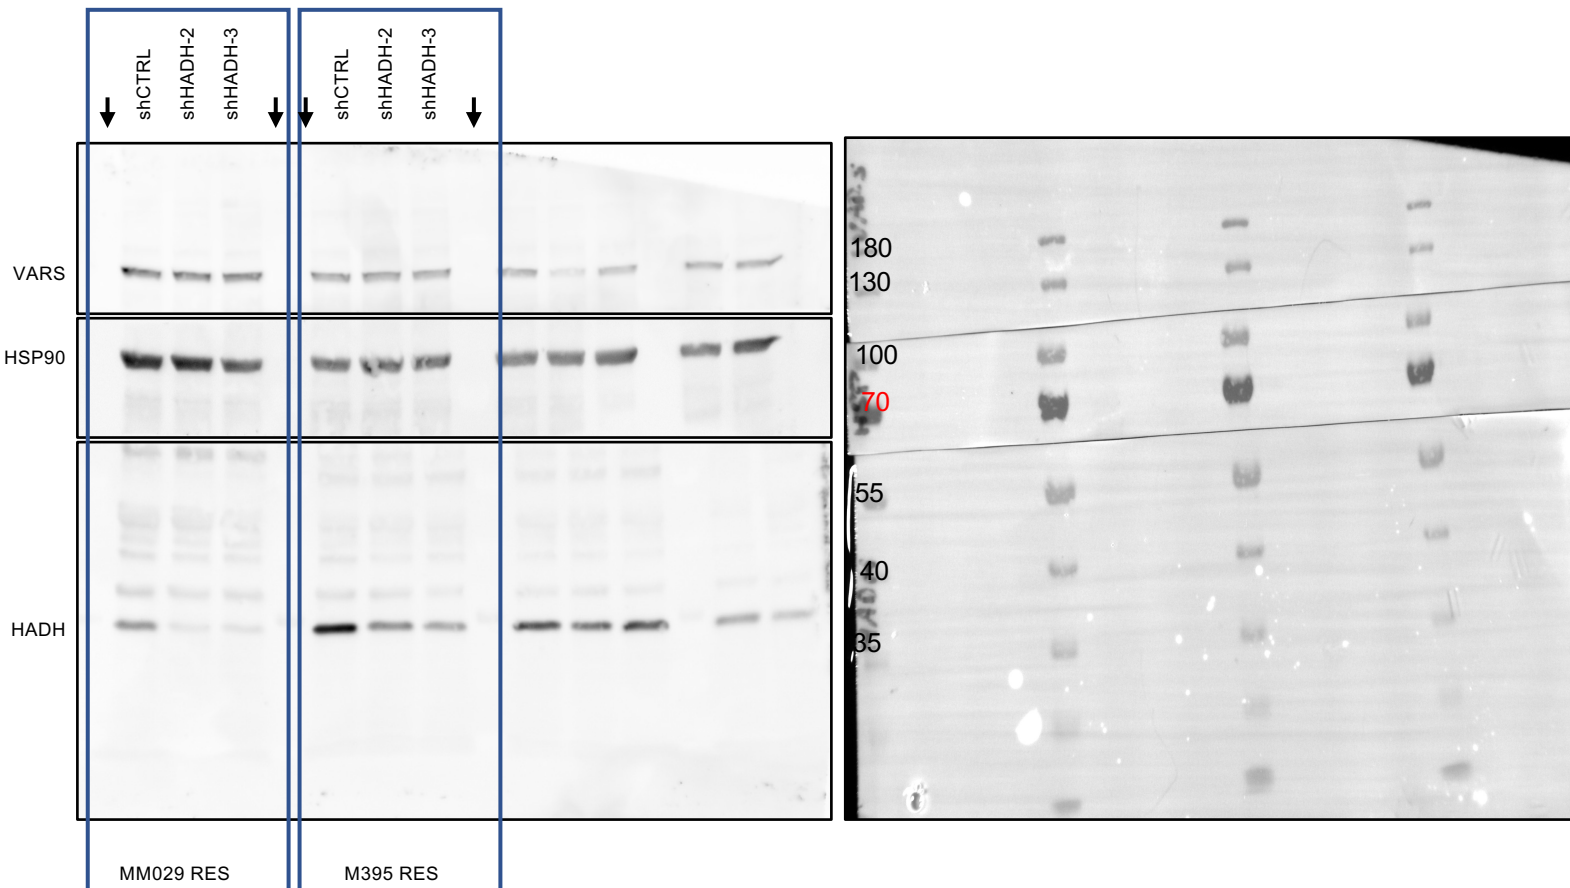

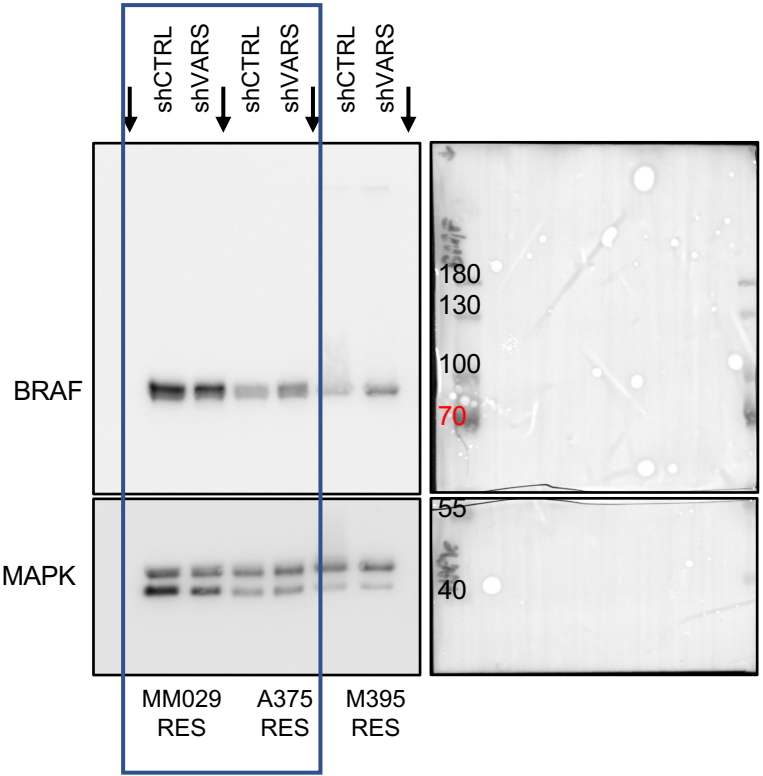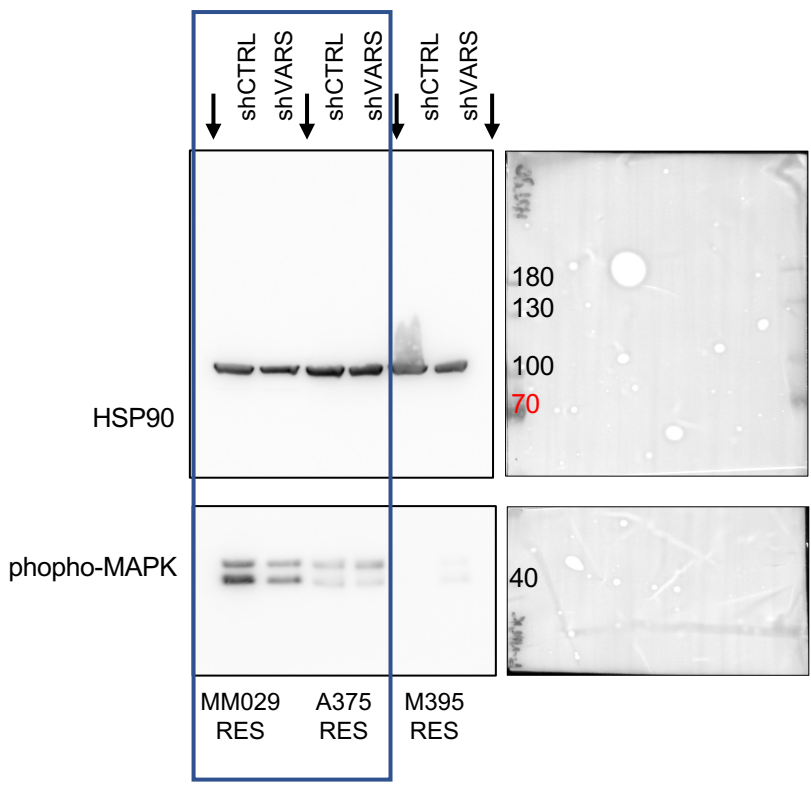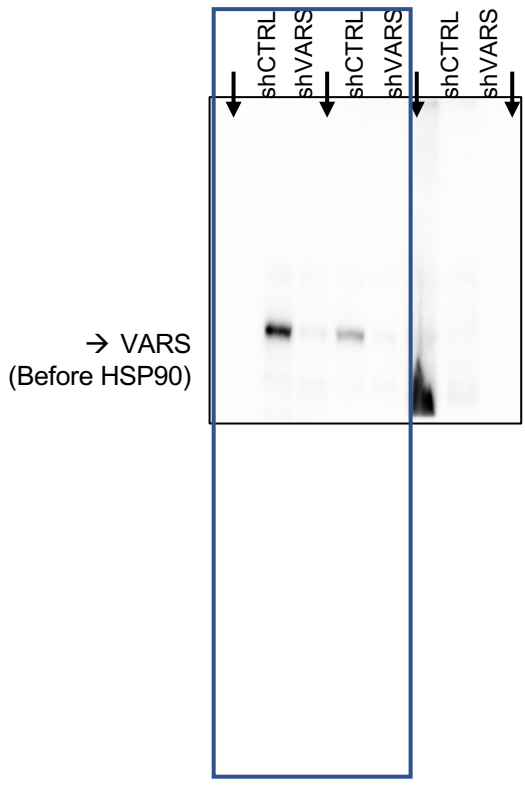

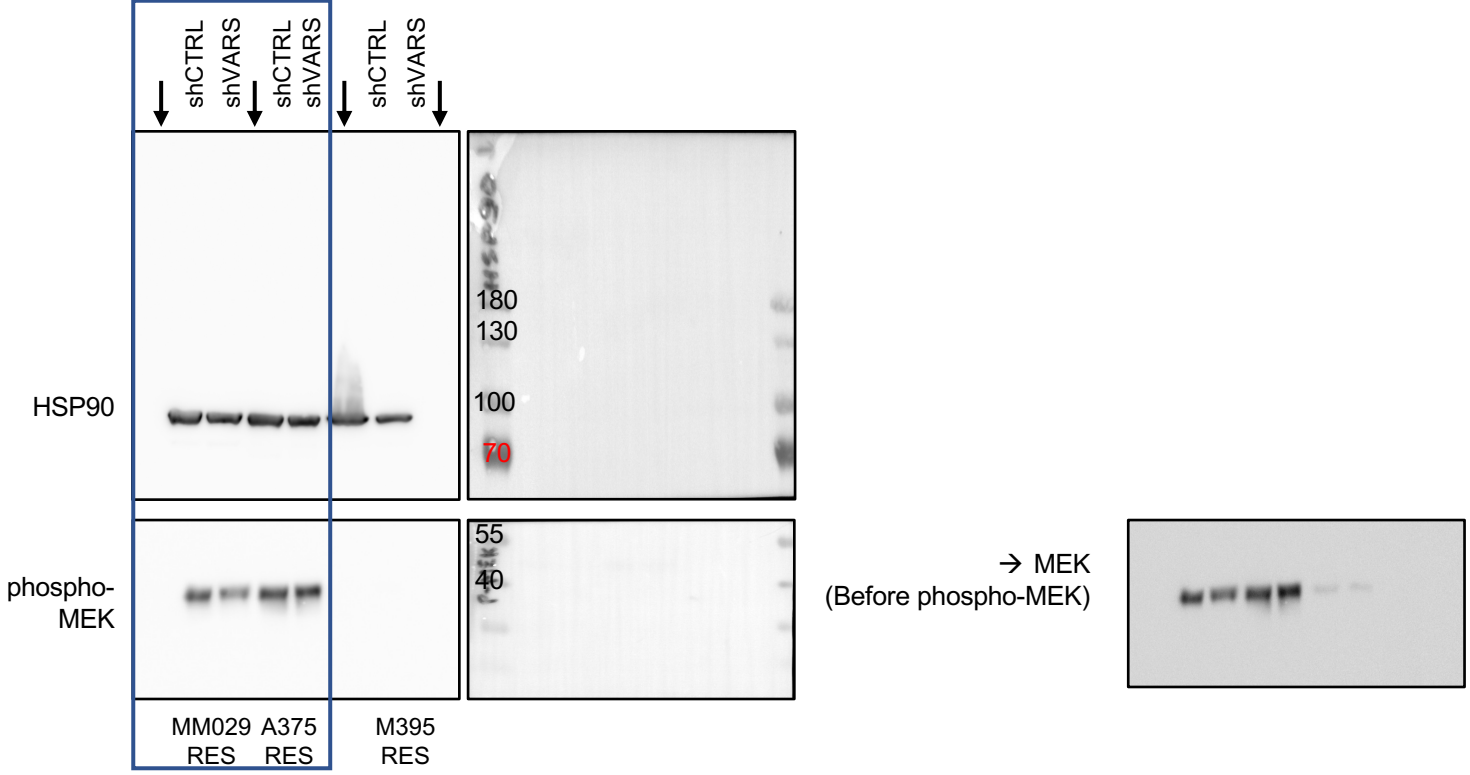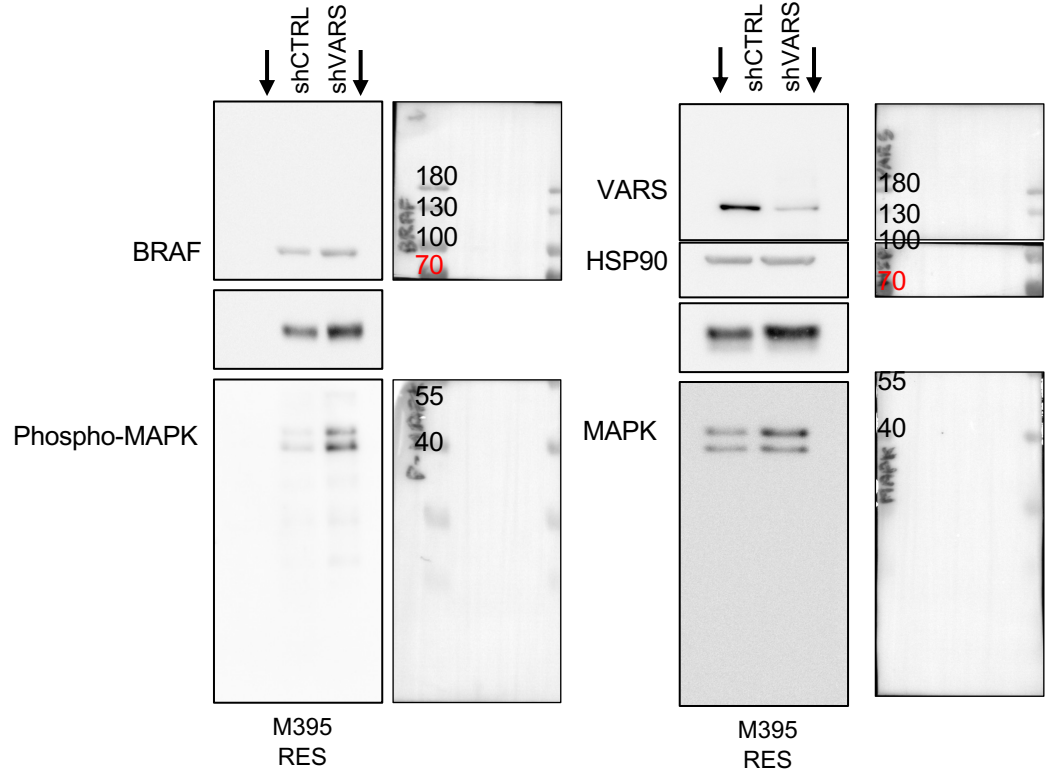

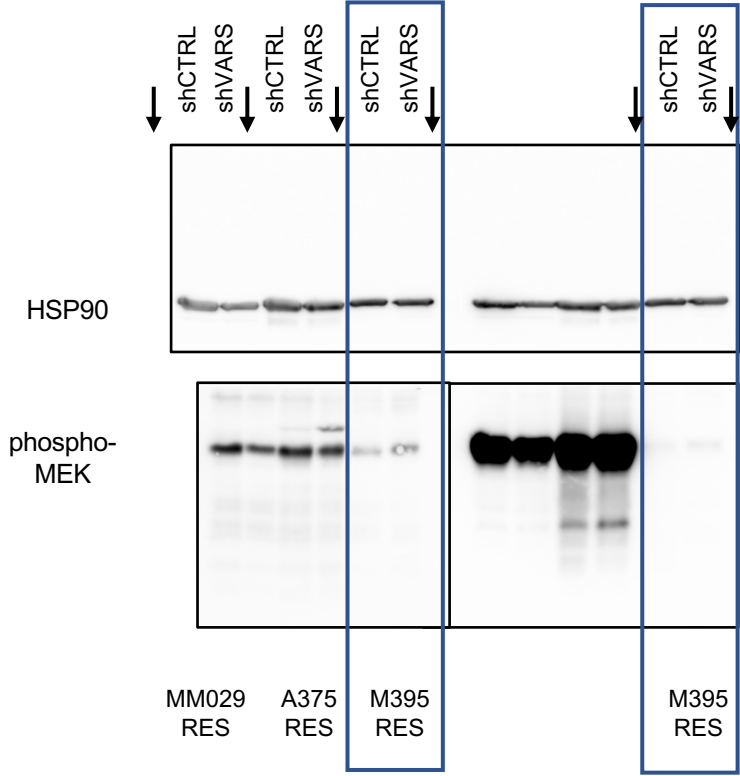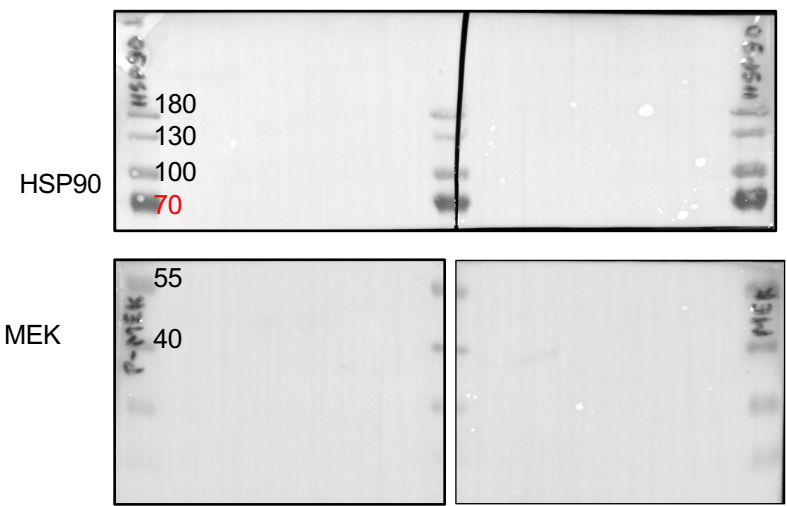

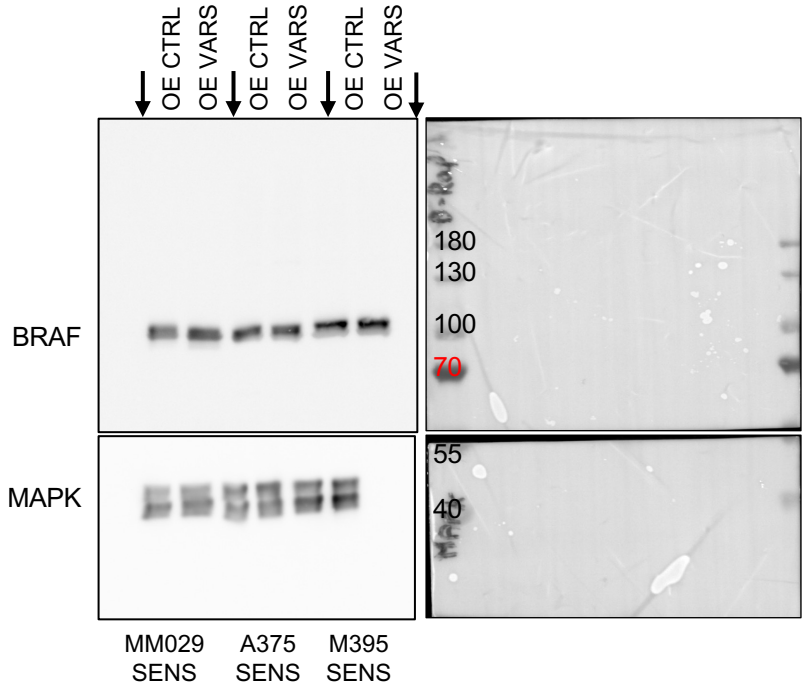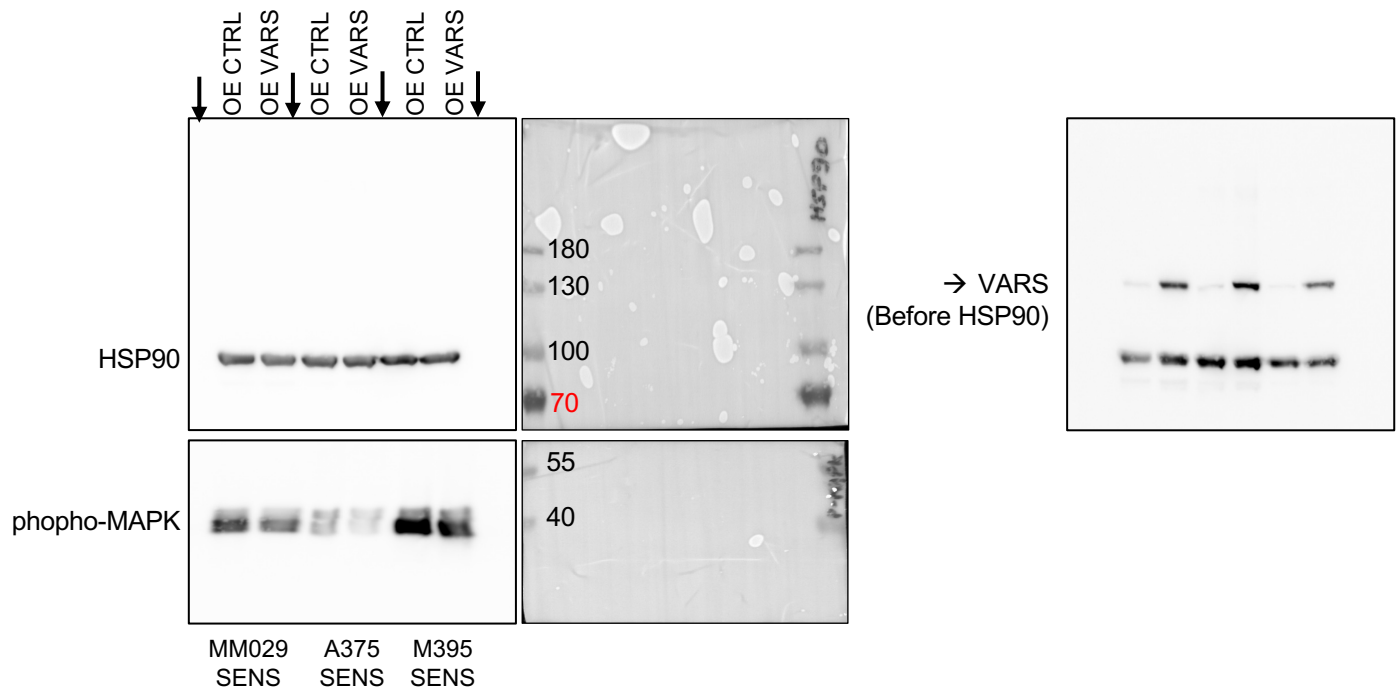

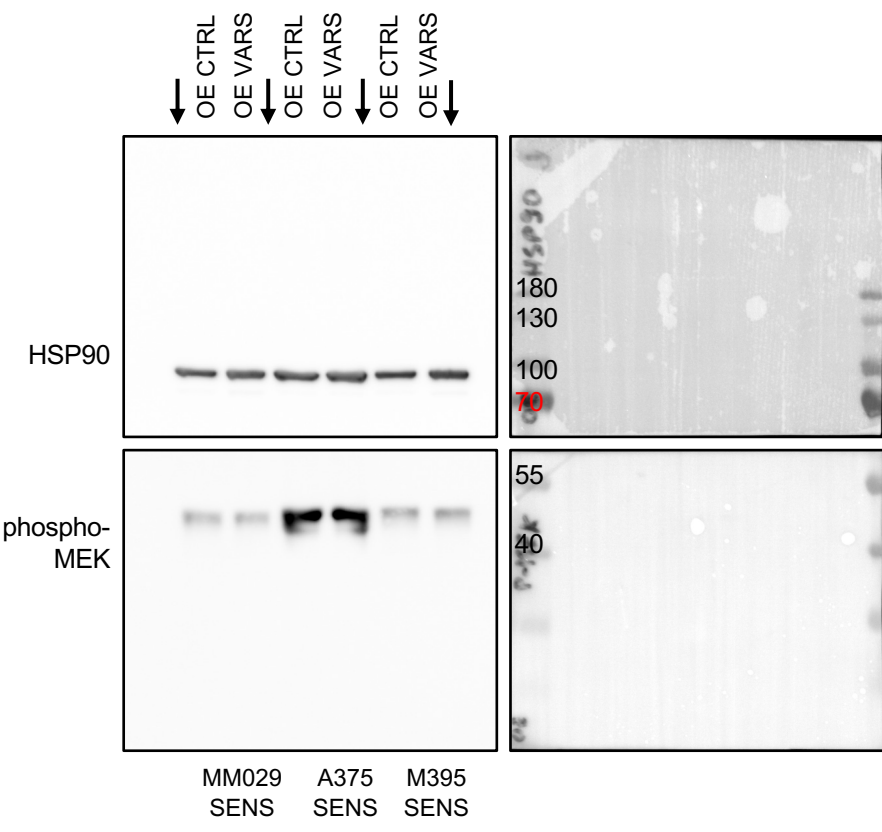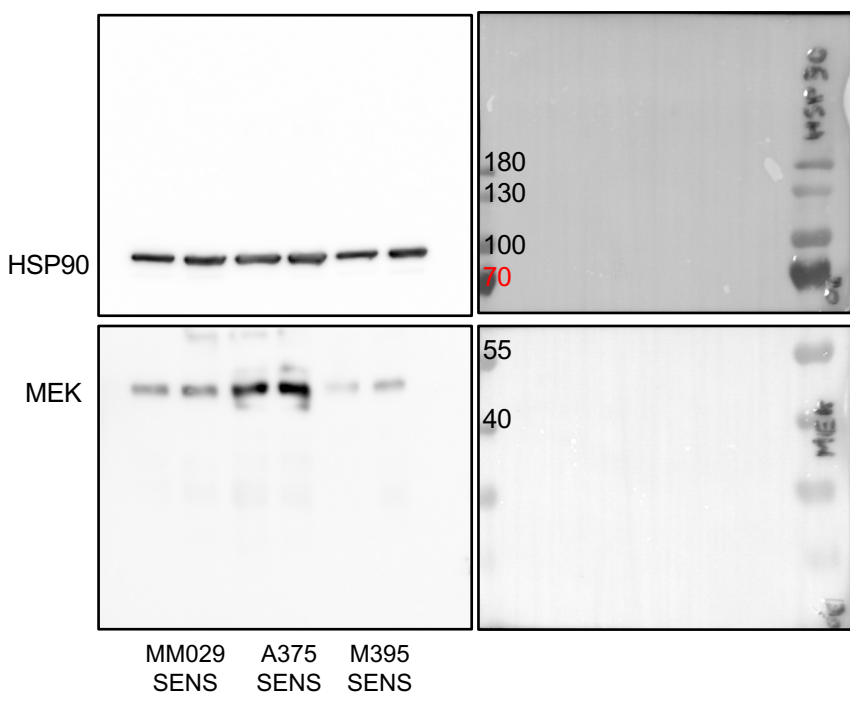

Supplement: 41556_2024_1439_MOESM14_ESM.pdf [file 41556_2024_1439_MOESM14_ESM.pdf]
