# Supplementary material for: Valine aminoacyl-tRNA synthetase promotes therapy resistance in melanoma
Source: PubMed Central journal article supplement (PMC11252002; doi:10.1038/s41556-024-01439-2), 2024-06-07
Supplement: 41556_2024_1439_MOESM2_ESM.pdf [file 41556_2024_1439_MOESM2_ESM.pdf]

## Reporting Summary

Nature Portfolio wishes to improve the reproducibility of the work that we publish. This form provides structure for consistency and transparency in reporting. For further information on Nature Portfolio policies, see our [Editorial Policies](#) and the [Editorial Policy Checklist](#).

### Statistics

For all statistical analyses, confirm that the following items are present in the figure legend, table legend, main text, or Methods section.

n/a | Confirmed

- The exact sample size ( $n$ ) for each experimental group/condition, given as a discrete number and unit of measurement
- A statement on whether measurements were taken from distinct samples or whether the same sample was measured repeatedly
- The statistical test(s) used AND whether they are one- or two-sided  
*Only common tests should be described solely by name; describe more complex techniques in the Methods section.*
- A description of all covariates tested
- A description of any assumptions or corrections, such as tests of normality and adjustment for multiple comparisons
- A full description of the statistical parameters including central tendency (e.g. means) or other basic estimates (e.g. regression coefficient) AND variation (e.g. standard deviation) or associated estimates of uncertainty (e.g. confidence intervals)
- For null hypothesis testing, the test statistic (e.g.  $F$ ,  $t$ ,  $r$ ) with confidence intervals, effect sizes, degrees of freedom and  $P$  value noted  
*Give  $P$  values as exact values whenever suitable.*
- For Bayesian analysis, information on the choice of priors and Markov chain Monte Carlo settings
- For hierarchical and complex designs, identification of the appropriate level for tests and full reporting of outcomes
- Estimates of effect sizes (e.g. Cohen's  $d$ , Pearson's  $r$ ), indicating how they were calculated

*Our web collection on [statistics for biologists](#) contains articles on many of the points above.*

### Software and code

Policy information about [availability of computer code](#)

Data collection

- Homo sapiens transcriptome was downloaded from the human genome database (HGD-ENSEMBL) for codon and amino acid enrichment analysis.

Data analysis

- All statistical tests: chi-square test, student's t test, ANOVA test were performed on Excel 2016 or GraphPad Prism 10.  
 - Codon enrichment was evaluated using a chi-squared test, comparing the codon distribution of each of the genes from each group to the human transcriptome. The same was applied for the amino acid enrichment analysis.  
 - Gene enrichment pathways were assessed by using Gene Set Enrichment Analysis (GSEA). Bubble plots representing the pathways were generated using R or GraphPad Prism.  
 - GEPIA2 tool was used to assess survival analysis and expression of aaRSs (in The Cancer Genome Atlas (TCGA) database).  
 - For the establishment of VARS signature: A custom R script using single-sample GSEA (ssGSEA) and a differential expression analysis with Limma R package's (v3.56.1) was used in this study.  
 - For proteomics analysis the following software were used: MaxQuant software v1.6.0.16  
 - QuPath 0.3.2 is used for the quantification of the immunolabelled melanoma cells.  
 - Diricore analysis for codon occupancy was used from github ([https://github.com/pkornor218/Ribosome\\_Diricore\\_pipeline/](https://github.com/pkornor218/Ribosome_Diricore_pipeline/)).

For manuscripts utilizing custom algorithms or software that are central to the research but not yet described in published literature, software must be made available to editors and reviewers. We strongly encourage code deposition in a community repository (e.g. GitHub). See the Nature Portfolio [guidelines for submitting code & software](#) for further information.

## Data

Policy information about [availability of data](#)

All manuscripts must include a [data availability statement](#). This statement should provide the following information, where applicable:

- Accession codes, unique identifiers, or web links for publicly available datasets
- A description of any restrictions on data availability
- For clinical datasets or third party data, please ensure that the statement adheres to our [policy](#)

Polysome and RNA sequencing: Gene Expression Omnibus; accession number GSE236046;  
 Ribosome sequencing: Gene Expression Omnibus; accession number GSE236642;  
 tRNA sequencing: Gene Expression Omnibus; accession number GSE236645;

Proteomics data: The Mmass spectrometry data have been deposited in ProteomeXchange with the primary accession code PXD044863 (<https://www.ebi.ac.uk/pride/archive/projects/PXD044863/private>) and PXD044910 (<https://www.ebi.ac.uk/pride/archive/projects/PXD044910/private>).

For the establishment of VARS signature: A custom R script using single-sample GSEA (ssGSEA) and a differential expression analysis with Limma R package's (v3.56.1) was used in this study.

## Research involving human participants, their data, or biological material

Policy information about studies with [human participants or human data](#). See also policy information about [sex, gender \(identity/presentation\), and sexual orientation](#) and [race, ethnicity and racism](#).

|                                                                    |                                                                                                                                                                                                                                                                                                                                                                                                                                                                                                                     |
|--------------------------------------------------------------------|---------------------------------------------------------------------------------------------------------------------------------------------------------------------------------------------------------------------------------------------------------------------------------------------------------------------------------------------------------------------------------------------------------------------------------------------------------------------------------------------------------------------|
| Reporting on sex and gender                                        | 8 biopsies from women and 7 biopsies from men were available. Sex and gender were not considered in the study design nor in the data analysis.                                                                                                                                                                                                                                                                                                                                                                      |
| Reporting on race, ethnicity, or other socially relevant groupings | N/A                                                                                                                                                                                                                                                                                                                                                                                                                                                                                                                 |
| Population characteristics                                         | Human biopsy samples from male and female patients of age range between 26 and 81 years old were retrieved from the biobank of the University Hospital Center in Liege. Patients were all diagnosed with melanoma, and were tested positive for BRAF mutation. All samples used were obtained from leftover biopsy samples when available and did not interfere with standard practices of care (12 samples were obtained for normal skin, 12 samples for primary melanoma and 21 samples for metastatic melanoma). |
| Recruitment                                                        | No active recruitment was performed. Leftover biopsy samples were used when available. Informed consent was obtained from the patients providing samples. The participants were not compensated.                                                                                                                                                                                                                                                                                                                    |
| Ethics oversight                                                   | The protocol was approved by the ethical committee of the University of Liege (#3006695).                                                                                                                                                                                                                                                                                                                                                                                                                           |

Note that full information on the approval of the study protocol must also be provided in the manuscript.

## Field-specific reporting

Please select the one below that is the best fit for your research. If you are not sure, read the appropriate sections before making your selection.

Life sciences  Behavioural & social sciences  Ecological, evolutionary & environmental sciences

For a reference copy of the document with all sections, see [nature.com/documents/nr-reporting-summary-flat.pdf](https://www.nature.com/documents/nr-reporting-summary-flat.pdf)

## Life sciences study design

All studies must disclose on these points even when the disclosure is negative.

|                 |                                                                                                                                                                                                                                                                                                       |
|-----------------|-------------------------------------------------------------------------------------------------------------------------------------------------------------------------------------------------------------------------------------------------------------------------------------------------------|
| Sample size     | Animal sample size experiment was assessed by Web Power. For the other experiments, no sample size calculation was performed.                                                                                                                                                                         |
| Data exclusions | Concerning mice experiment, we performed ROUT test on GraphPad Prism to identify outliers. One mouse harbouring shCTRL tumor on one flank and shVARS-1 tumor on the other flank was identified as outlier and excluded from the analysis.                                                             |
| Replication     | All experiments were performed with at least 2 biological replicates. The exact number of replicates is stated in figure legends                                                                                                                                                                      |
| Randomization   | Randomization was not performed, experiments were done in cell lines or xenografts were randomization is not applicable. Allocation of samples into experimental groups is not relevant, as the study helps us identify new features to discriminate between already established experimental groups. |
| Blinding        | Xenograft experiments were not performed in blind as these experiments are conducted for explorative purposes.                                                                                                                                                                                        |

# Reporting for specific materials, systems and methods

We require information from authors about some types of materials, experimental systems and methods used in many studies. Here, indicate whether each material, system or method listed is relevant to your study. If you are not sure if a list item applies to your research, read the appropriate section before selecting a response.

## Materials & experimental systems

- n/a  Involved in the study
- Antibodies
- Eukaryotic cell lines
- Palaeontology and archaeology
- Animals and other organisms
- Clinical data
- Dual use research of concern
- Plants

## Methods

- n/a  Involved in the study
- ChIP-seq
- Flow cytometry
- MRI-based neuroimaging

## Antibodies

### Antibodies used

All antibodies and dilutions used in this study are listed in supplementary table 1.

| Name                                         | Antibody                 | Host   | Reactivity | Company                  | Catalogue number                   | Size (kDa) | Application               |
|----------------------------------------------|--------------------------|--------|------------|--------------------------|------------------------------------|------------|---------------------------|
| VARs                                         | ValRS (D-7)              | Mouse  | H, M       | Rats                     | Santa-Cruz sc-166674               | 130        | WB                        |
| NBP2-20843                                   | VARs                     | Rabbit | H          | Novus Biological         | NBP2-20843                         |            | IHC                       |
| HADH                                         | HADH                     | Rabbit | H, M       | Rats                     | Invitrogen/ ThermoFisher PA5-31157 | 34         | WB/ IHC                   |
| CPT1a                                        | CPT1A (D3B3)             | Rabbit | H          | Cell Signaling           | 12252                              | 88         | WB                        |
| GAPDH                                        | GAPDH (D16H11)           | Rabbit | H, M, R    | Mk                       | Cell Signaling                     | 5174       | 37 WB                     |
| HSP90                                        | Hsp90 alpha/beta (H-114) | Rabbit | H          | Santa-Cruz               | sc-7947                            | 90         | WB                        |
| ATF4                                         | ATF4                     | Rabbit | H, M, R    | Cell Signaling           | 11815s                             | 49         | WB                        |
| p-EIF2alpha (Ser51)                          | Phospho-eIF2α (Ser51)    | Rabbit | H,M        | R                        | Cell Signaling                     | 9721S      | 38 WB                     |
| EIF2alpha                                    | eIF2α                    | Rabbit | H,M        | R                        | Cell Signaling                     | 9722       | 38 WB                     |
| SLC7A5                                       | LAT1                     | Rabbit | H          | Cell Signaling           | 5347S                              | 39         | WB                        |
| KIF13B                                       | KIF13B                   | Rabbit | H          | Bio-techne               | NBP1-83398                         | 200        | WB                        |
| QDPR                                         | QDPR (B-1)               | Mouse  | H          | Santa-Cruz               | sc-376218                          | 26         | WB                        |
| GOLT1B                                       | GOLT1B                   | Rabbit | H, M, R    | Gentaur                  | DF9071                             | 15         | WB                        |
| BRAF (F-3)                                   | BRAF                     | Mouse  | H,M,Rats   | Santa cruz               | sc-55522                           | 95         | WB                        |
| MEK1/2 (L38C12)                              | MEK 1/2                  | Mouse  | H, M, R    | Mk                       | Cell Signaling                     | 4694       | 45, WB                    |
| Phospho-MEK1/2 (Ser217/221) (41G9)           | Phospho-MEK1/2           | Rabbit | H, M, R    | Mk                       | Cell Signaling                     | 9154       | 45, WB                    |
| p44/p42 MAPK (Erk1/2), ERK                   | MAPK (Erk1/2)            | Rabbit | H, M, R    | Hm, Mk, Mi, Z, B, Pg, Sc | Cell Signaling                     | 9102       | 42-44, WB/IP              |
| Phospho-p44/42 MAPK (Erk1/2) (Thr202/Tyr204) | Phospho-ERK              | Rabbit | H, M, R    | Hm, Mk, Mi, Z, B, Pg, Sc | Cell Signaling                     | 4370       | 42-44, WB/ IP/ IHC/ IF/ F |

### Validation

Validation of the listed antibodies was performed by the manufacturer. Data is available at the manufacturer's website as indicated below:

ValRS sc-166674: <https://www.scbt.com/fr/p/valrs-antibody-d-7>

VARs (NBP2-20843): [https://www.novusbio.com/products/vars-antibody\\_nbp2-20843](https://www.novusbio.com/products/vars-antibody_nbp2-20843)

HADH (PA5-31157): <https://www.thermofisher.com/antibody/product/HADH-Antibody-Polyclonal/PA5-31157>

CPT1a (12252): <https://www.cellsignal.com/products/primary-antibodies/cpt1a-d3b3-rabbit-mab/12252>

GAPDH (5174): <https://www.cellsignal.com/products/primary-antibodies/gapdh-d16h11-xp-rabbit-mab/5174>

HSP90 (sc-7947): [https://www.scbt.com/p/hsp-90alpha-antibody-f-2?](https://www.scbt.com/p/hsp-90alpha-antibody-f-2?gad_source=1&gclid=EAlaIqobChMIopaDxem5hQMVnLVoCR1Z_QqREAYASAAEgJgWPD_BwE)

ATF4 (11815s): <https://www.cellsignal.com/datasheet.jsp?productId=11815&images=1>

p-EIF2alpha (Ser51) (9721S): <https://www.cellsignal.com/products/primary-antibodies/phospho-eif2a-ser51-antibody/9721>

EIF2alpha (9722): <https://www.cellsignal.com/products/primary-antibodies/eif2a-antibody/9722>

SLC7A5 (5347S): <https://www.cellsignal.com/products/primary-antibodies/lat1-antibody/5347>

KIF13B (NBP1-83398): [https://www.bio-techne.com/p/antibodies/kif13b-antibody\\_nbp1-83398](https://www.bio-techne.com/p/antibodies/kif13b-antibody_nbp1-83398)

QDPR (sc-376218): <https://www.scbt.com/fr/p/qdpr-antibody-b-1>

BRAF (F-3) (sc-55522): [https://www.scbt.com/p/raf-b-antibody-f-3?](https://www.scbt.com/p/raf-b-antibody-f-3?gad_source=1&gclid=EAlaIqobChMIImeTrrOu5hQMVqSOGAB1hwgDzEAYASAAEgLaj_D_BwE)

MEK1/2 (L38C12) (4694): <https://www.cellsignal.com/products/primary-antibodies/mek1-2-l38c12-mouse-mab/4694>

Phospho-MEK1/2 (Ser217/221) (41G9) (9154): <https://www.cellsignal.com/products/primary-antibodies/phospho-mek1-2-ser217-221-41g9-rabbit-mab/9154>

p44/p42 MAPK (Erk1/2) (9102): <https://www.cellsignal.com/products/primary-antibodies/p44-42-mapk-erk1-2-antibody/9102>

Phospho-p44/42 MAPK (Erk1/2) (Thr202/Tyr204) (4370): <https://www.cellsignal.com/products/primary-antibodies/phospho-p44-42-mapk-erk1-2-thr202-tyr204-d13-14-4e-xp-174-rabbit-mab/4370>

For GOLT1B antibody validation was performed in Liu et al. Cancer Cell Int (2021).

## Eukaryotic cell lines

Policy information about [cell lines and Sex and Gender in Research](#)

|                                                                      |                                                                                                                                                                                                                                                                                                                                                                                                                                                                                                                                                                                                                                                                                                                                                 |
|----------------------------------------------------------------------|-------------------------------------------------------------------------------------------------------------------------------------------------------------------------------------------------------------------------------------------------------------------------------------------------------------------------------------------------------------------------------------------------------------------------------------------------------------------------------------------------------------------------------------------------------------------------------------------------------------------------------------------------------------------------------------------------------------------------------------------------|
| Cell line source(s)                                                  | Cell lines source is stated in the material and methods section of the manuscript (Cell culture).<br>A375 melanoma cell lines were purchased from ATCC.<br>A375 vemurafenib-resistant cells were generated by increasing doses of vemurafenib up to 1 $\mu$ M.<br>M395 (SENS and 1 $\mu$ M vemurafenib RES) lines were from the laboratory of R. Lo (UCLA Division of Dermatology) - non commercial.<br>MM029, MM099 and MM383 naïve and their resistant counterparts (0.2 $\mu$ M dabrafenib and 40 nM of trametinib) were provided by J.C. Marine (KU Leuven) - non commercial<br>MM074 was provided by G. Ghanem (Institut J. Bordet, Université Libre de Bruxelles) - non commercial<br>Lenti-X293T cells were purchased from sigma-aldrich |
| Authentication                                                       | None of the cell lines used were authenticated.                                                                                                                                                                                                                                                                                                                                                                                                                                                                                                                                                                                                                                                                                                 |
| Mycoplasma contamination                                             | Mycoplasma test was performed routinely. Only negative lines are used in the study.                                                                                                                                                                                                                                                                                                                                                                                                                                                                                                                                                                                                                                                             |
| Commonly misidentified lines<br>(See <a href="#">ICLAC</a> register) | None of the used cells are in the misidentified lines.                                                                                                                                                                                                                                                                                                                                                                                                                                                                                                                                                                                                                                                                                          |

## Animals and other research organisms

Policy information about [studies involving animals](#); [ARRIVE guidelines](#) recommended for reporting animal research, and [Sex and Gender in Research](#)

|                         |                                                                                                                                                                                                                                                                          |
|-------------------------|--------------------------------------------------------------------------------------------------------------------------------------------------------------------------------------------------------------------------------------------------------------------------|
| Laboratory animals      | Eight-weeks-old NOD/SCID mice. Experiments were approved by the Ethical committee of the University of Liege (#2126). The temperature and relative humidity were 21 °C and 45–60%, respectively. Cages were ventilated, softly lit, and subjected to a light dark cycle. |
| Wild animals            | no wild animal was used in thids study                                                                                                                                                                                                                                   |
| Reporting on sex        | Sex was not considered in the study design.                                                                                                                                                                                                                              |
| Field-collected samples | no field collected samples were used in the study.                                                                                                                                                                                                                       |
| Ethics oversight        | Experiments were approved by the Ethical committee of the University of Liege (#2126).                                                                                                                                                                                   |

Note that full information on the approval of the study protocol must also be provided in the manuscript.

## Flow Cytometry

### Plots

Confirm that:

- The axis labels state the marker and fluorochrome used (e.g. CD4-FITC).
- The axis scales are clearly visible. Include numbers along axes only for bottom left plot of group (a 'group' is an analysis of identical markers).
- All plots are contour plots with outliers or pseudocolor plots.
- A numerical value for number of cells or percentage (with statistics) is provided.

### Methodology

|                           |                                                                                                                                                                                                                                                                                                                                                                                                                                                                                                                                                     |
|---------------------------|-----------------------------------------------------------------------------------------------------------------------------------------------------------------------------------------------------------------------------------------------------------------------------------------------------------------------------------------------------------------------------------------------------------------------------------------------------------------------------------------------------------------------------------------------------|
| Sample preparation        | For the nuclear fragmentation assay: Supernatant and trypsinized cells were collected and stained with Nicoletti Buffer (0,1% Trinitriumcitrat-Dihydrat pH7.4, 0,1% Triton-X 100, 0.01% Propidium iodide).<br>For OPP and HPG assay: Cells were incubated with OPP or HPG (following an incubation in methionine-free media for HPG analysis) at indicated times in the material and methods section. Cells were then washed, fixed and permeabilized and the Click-iT Cell Reaction buffer Kit was used following the manufacturer's instructions. |
| Instrument                | FACS Canto II (OPP and HPG), Cytoflex Cytometer (Nuclear fragmentation assay)                                                                                                                                                                                                                                                                                                                                                                                                                                                                       |
| Software                  | FlowJo, BD FACSDiva software.                                                                                                                                                                                                                                                                                                                                                                                                                                                                                                                       |
| Cell population abundance | No sorting was performed                                                                                                                                                                                                                                                                                                                                                                                                                                                                                                                            |

Gating strategy

The gating strategy for cell death assay, OPP and HPG are provided in supplementary information. Cell death was determined as sub G1 population. For HPG and OPP healthy cells were gated (FSC\_SSC plot) and doublets were removed (FSC-A\_FSC-H plot). Cells positive for OPP or HPG are represented in the gating strategy.

Tick this box to confirm that a figure exemplifying the gating strategy is provided in the Supplementary Information.
