# Supplementary material for: Valine aminoacyl-tRNA synthetase promotes therapy resistance in melanoma
Source: PubMed Central journal article supplement (PMC11252002; doi:10.1038/s41556-024-01439-2), 2024-06-07

Related to figure 7d

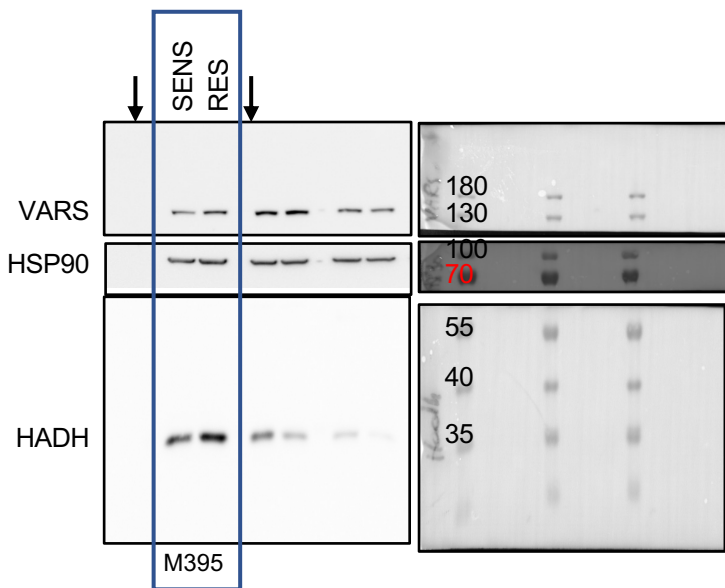

Related to figure 7e

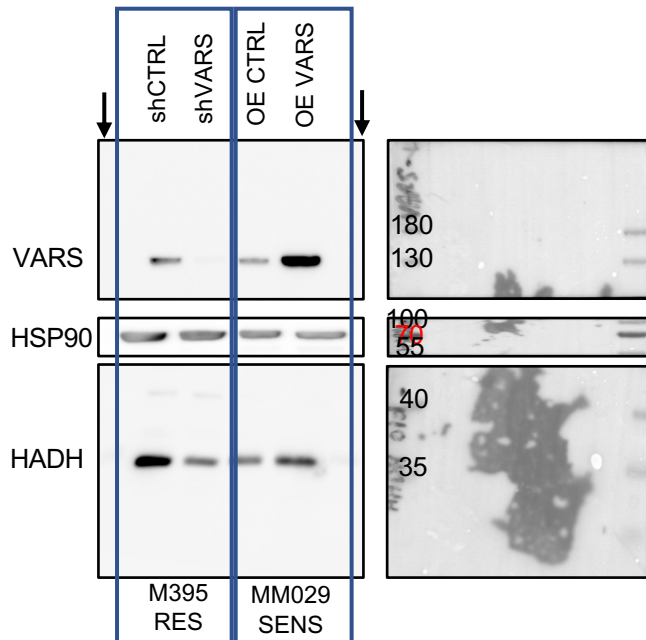

Related to figure 7f

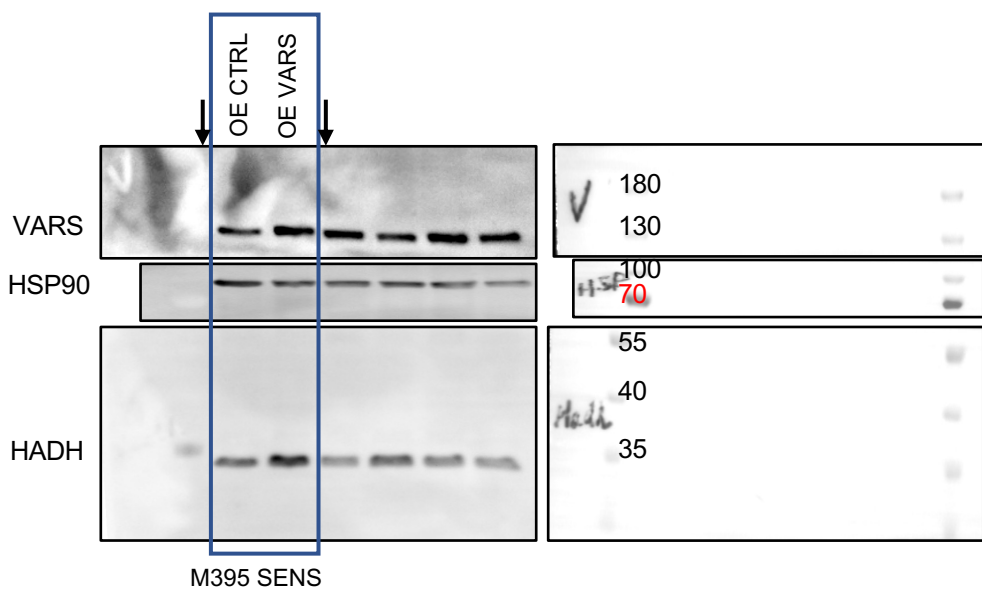

Related to figure 7e

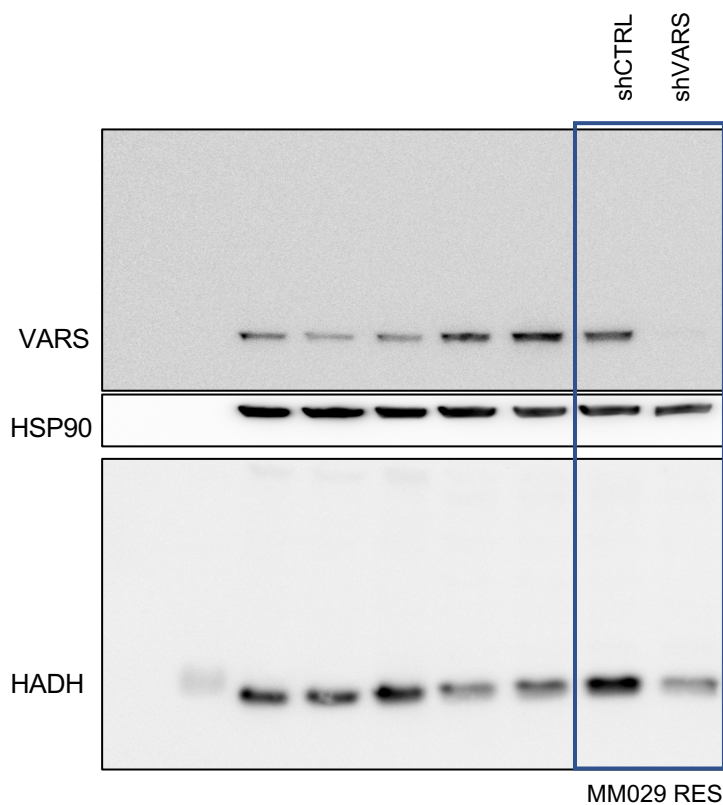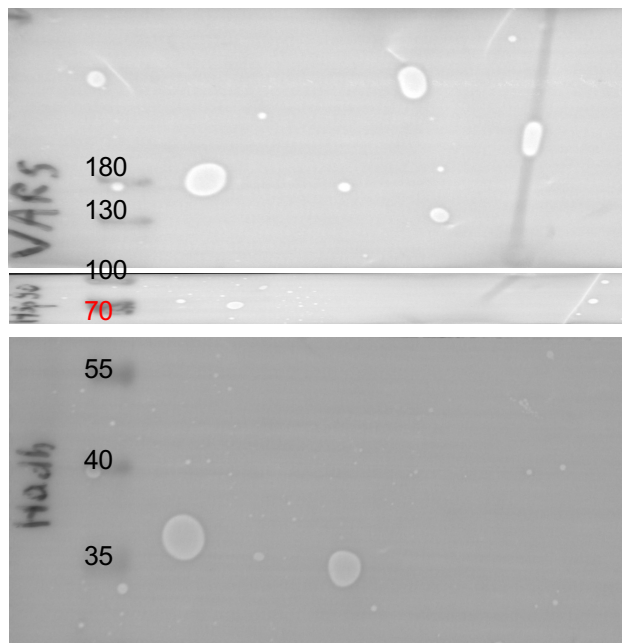

Related to figure 7f

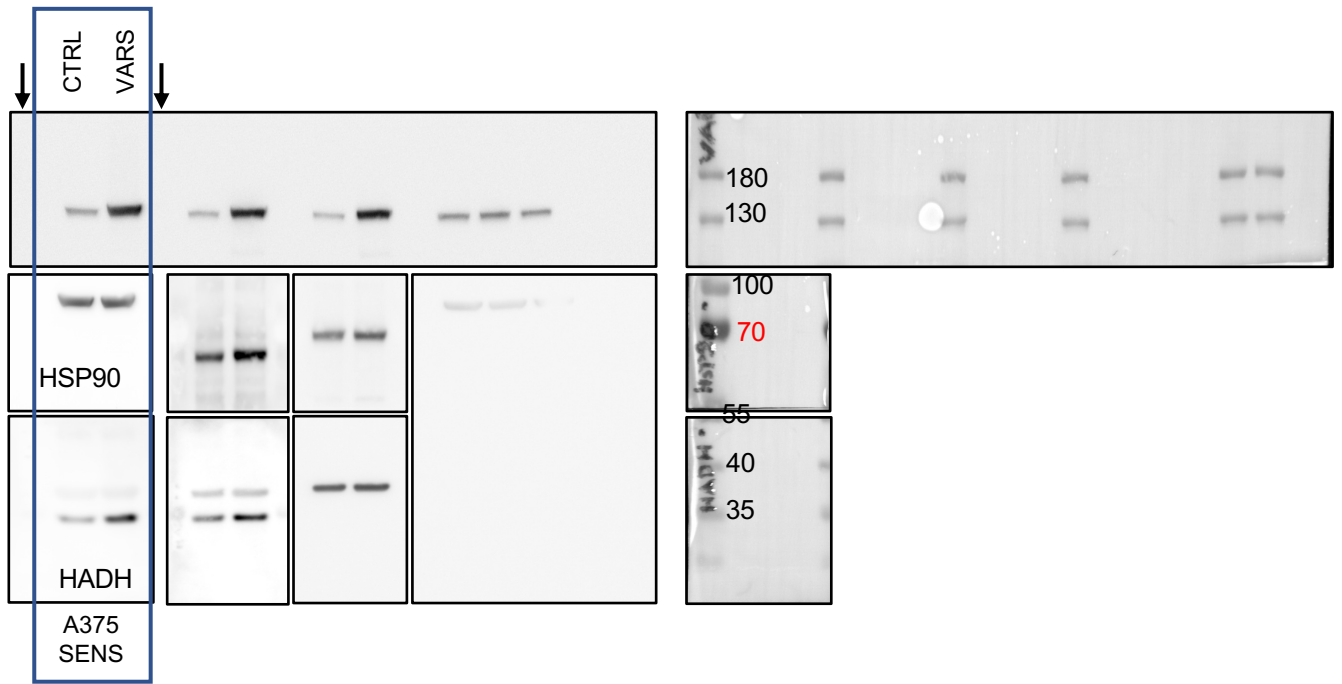

Related to figure 7e

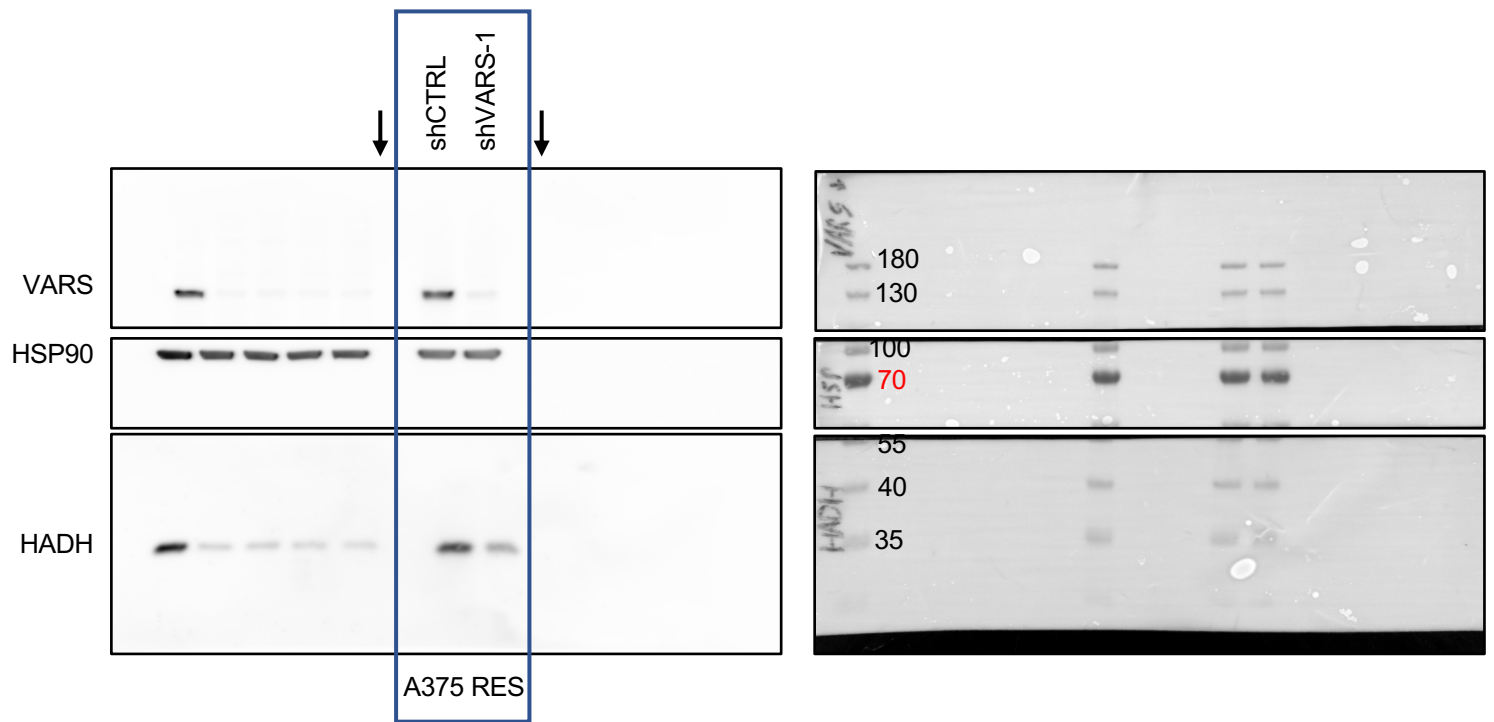

Supplement: 41556_2024_1439_MOESM9_ESM.pdf [file 41556_2024_1439_MOESM9_ESM.pdf]
