# Supplementary material for: Valine aminoacyl-tRNA synthetase promotes therapy resistance in melanoma
Source: PubMed Central journal article supplement (PMC11252002; doi:10.1038/s41556-024-01439-2), 2024-06-07

Related to Extended data figure 5a

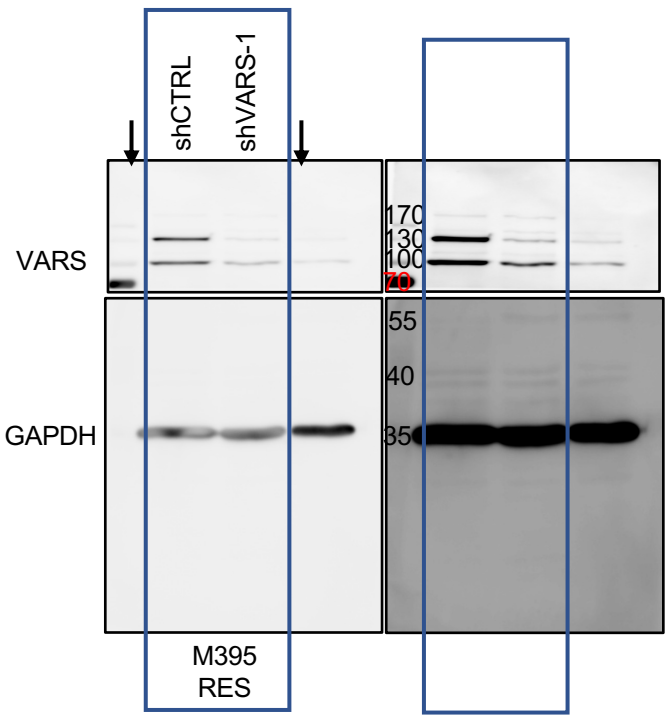

Related to Extended data figure 5b

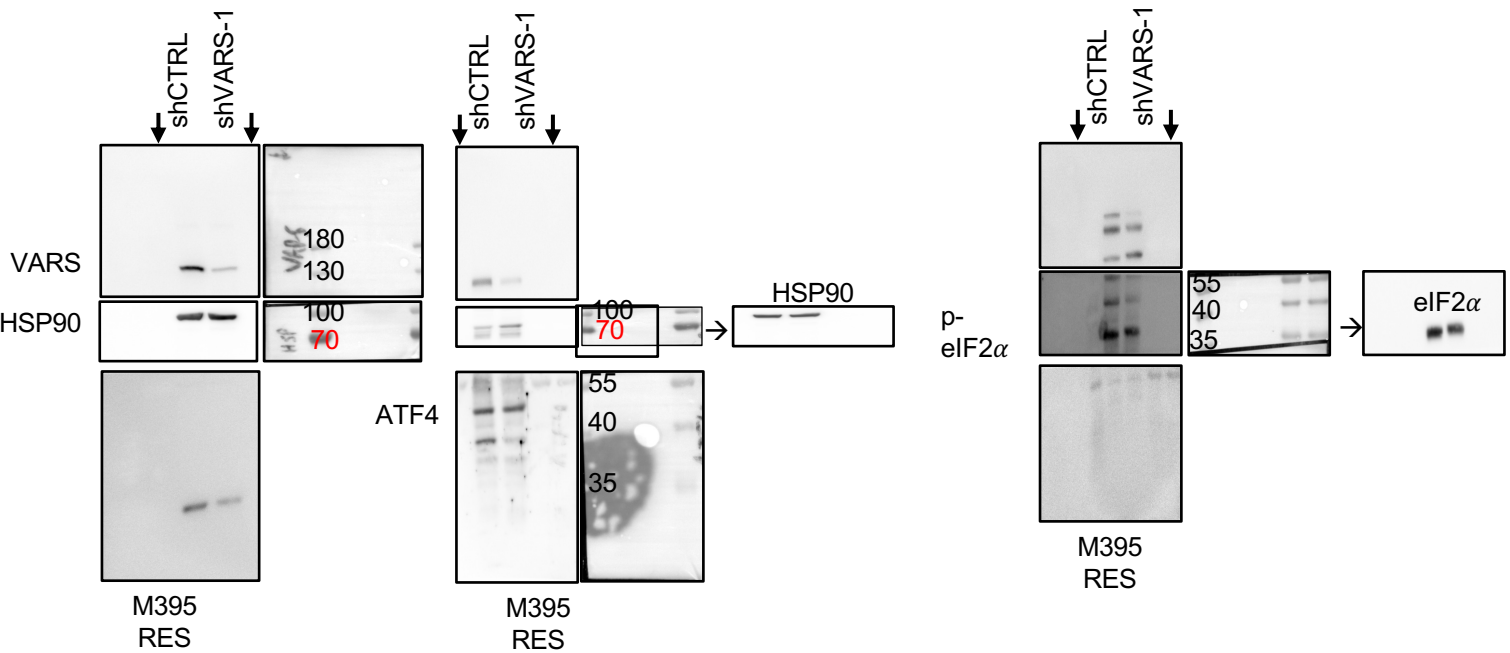

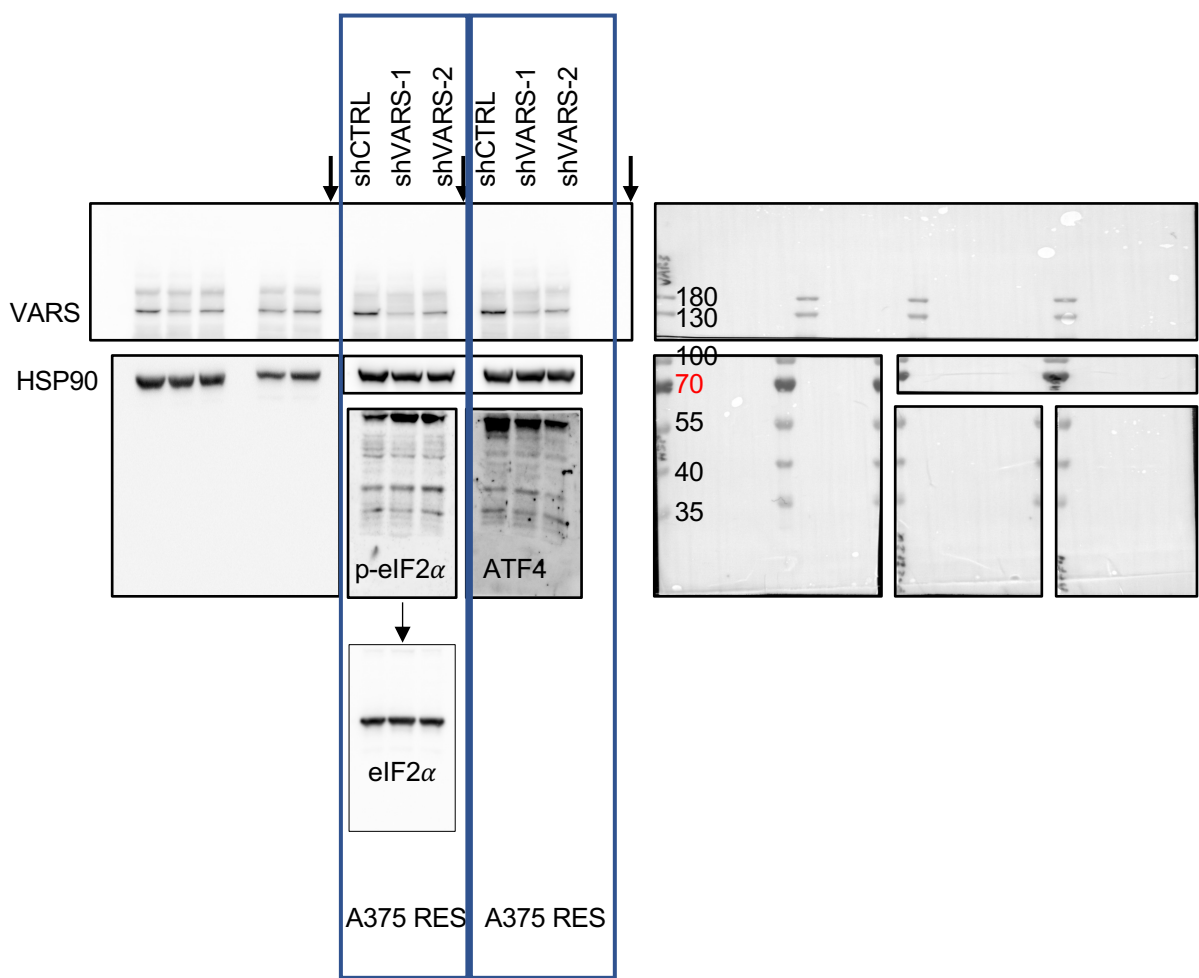

Supplement: 41556_2024_1439_MOESM13_ESM.pdf [file 41556_2024_1439_MOESM13_ESM.pdf]
